# Supplementary material
Source: publisher figshare collection journal article supplement (https://acs.figshare.com/ndownloader/files/5069701)
Supplement: Supplementary file 1 [file 5069701]

 
data_dt0682rm 
 
_audit_creation_method            SHELXL-97 
_chemical_name_systematic 
; 
 ? 
; 
_chemical_name_common             ? 
_chemical_melting_point           ? 
_chemical_formula_moiety          ? 
_chemical_formula_sum 
 'C30 H56 N2 O5' 
_chemical_formula_weight          524.77 
 
loop_ 
 _atom_type_symbol 
 _atom_type_description 
 _atom_type_scat_dispersion_real 
 _atom_type_scat_dispersion_imag 
 _atom_type_scat_source 
 'C'  'C'   0.0033   0.0016 
 'International Tables Vol C Tables 4.2.6.8 and 6.1.1.4' 
 'H'  'H'   0.0000   0.0000 
 'International Tables Vol C Tables 4.2.6.8 and 6.1.1.4' 
 'N'  'N'   0.0061   0.0033 
 'International Tables Vol C Tables 4.2.6.8 and 6.1.1.4' 
 'O'  'O'   0.0106   0.0060 
 'International Tables Vol C Tables 4.2.6.8 and 6.1.1.4' 
 
_symmetry_cell_setting            'MONOCLINIC' 
_symmetry_space_group_name_H-M    'P 2(1)/C'
 
loop_ 
 _symmetry_equiv_pos_as_xyz 
 'x, y, z' 
 '-x, y+1/2, -z+1/2' 
 '-x, -y, -z' 
 'x, -y-1/2, z-1/2' 
 
_cell_length_a                    11.7773(8) 
_cell_length_b                    21.0614(14) 
_cell_length_c                    13.4050(9) 
_cell_angle_alpha                 90.00 
_cell_angle_beta                  115.3460(10) 
_cell_angle_gamma                 90.00 
_cell_volume                      3005.0(3) 
_cell_formula_units_Z             4 
_cell_measurement_temperature     100(2) 
_cell_measurement_reflns_used     ? 
_cell_measurement_theta_min       ? 
_cell_measurement_theta_max       ? 
 
_exptl_crystal_description        BLOCK
_exptl_crystal_colour             COLOURLESS
_exptl_crystal_size_max           0.968 
_exptl_crystal_size_mid           0.826 
_exptl_crystal_size_min           0.813 
_exptl_crystal_density_meas       ? 
_exptl_crystal_density_diffrn     1.160 
_exptl_crystal_density_method     'not measured' 
_exptl_crystal_F_000              1160 
_exptl_absorpt_coefficient_mu     0.077 
_exptl_absorpt_correction_type    'SADABS'  
_exptl_absorpt_correction_T_min   ? 
_exptl_absorpt_correction_T_max   ? 
_exptl_absorpt_process_details    ? 
 
_exptl_special_details 
; 
 ? 
; 
 
_diffrn_ambient_temperature       100(2) 
_diffrn_radiation_wavelength      0.71073 
_diffrn_radiation_type            MoK\a 
_diffrn_radiation_source          'fine-focus sealed tube' 
_diffrn_radiation_monochromator   graphite 
_diffrn_measurement_device_type   'BRUKER SMART CCD AREA DETECTOR' 
_diffrn_measurement_method        'PHI-OMEGA' 
_diffrn_detector_area_resol_mean  0.3 
_diffrn_standards_number          ? 
_diffrn_standards_interval_count  ? 
_diffrn_standards_interval_time   ? 
_diffrn_standards_decay_%        <10  
_diffrn_reflns_number             11519 
_diffrn_reflns_av_R_equivalents   0.0191 
_diffrn_reflns_av_sigmaI/netI     0.0215 
_diffrn_reflns_limit_h_min        -12 
_diffrn_reflns_limit_h_max        12 
_diffrn_reflns_limit_k_min        -22 
_diffrn_reflns_limit_k_max        17 
_diffrn_reflns_limit_l_min        -14 
_diffrn_reflns_limit_l_max        14 
_diffrn_reflns_theta_min          1.91 
_diffrn_reflns_theta_max          22.50 
_reflns_number_total              3908 
_reflns_number_gt                 3585 
_reflns_threshold_expression      >2sigma(I) 
 
_computing_data_collection        'BRUKER AXS SMART 3' 
_computing_cell_refinement        'BRUKER AXS SMART 3'  
_computing_data_reduction         'BRUKER AXS SMART 3'  
_computing_structure_solution     'SHELXS-97 (Sheldrick, 1990)' 
_computing_structure_refinement   'SHELXL-97 (Sheldrick, 1997)' 
_computing_molecular_graphics     'PLATON, 'MERCURY 1.3' 
_computing_publication_material   ? 
 
_refine_special_details 
; 
 Refinement of F^2^ against ALL reflections.  The weighted R-factor wR and 
 goodness of fit S are based on F^2^, conventional R-factors R are based 
 on F, with F set to zero for negative F^2^. The threshold expression of 
 F^2^ > 2sigma(F^2^) is used only for calculating R-factors(gt) etc. and is 
 not relevant to the choice of reflections for refinement.  R-factors based 
 on F^2^ are statistically about twice as large as those based on F, and R- 
 factors based on ALL data will be even larger. 
; 
 
_refine_ls_structure_factor_coef  Fsqd  
_refine_ls_matrix_type            full 
_refine_ls_weighting_scheme       calc  
_refine_ls_weighting_details 
 'calc w=1/[\s^2^(Fo^2^)+(0.0454P)^2^+0.8907P] where P=(Fo^2^+2Fc^2^)/3' 
_atom_sites_solution_primary      direct 
_atom_sites_solution_secondary    difmap 
_atom_sites_solution_hydrogens    geom 
_refine_ls_hydrogen_treatment     mixed 
_refine_ls_extinction_method      none 
_refine_ls_extinction_coef        ? 
_refine_ls_number_reflns          3908 
_refine_ls_number_parameters      358 
_refine_ls_number_restraints      0 
_refine_ls_R_factor_all           0.0352 
_refine_ls_R_factor_gt            0.0324 
_refine_ls_wR_factor_ref          0.0852 
_refine_ls_wR_factor_gt           0.0832 
_refine_ls_goodness_of_fit_ref    1.041 
_refine_ls_restrained_S_all       1.041 
_refine_ls_shift/su_max           0.000 
_refine_ls_shift/su_mean          0.000 
 
loop_ 
 _atom_site_label 
 _atom_site_type_symbol 
 _atom_site_fract_x 
 _atom_site_fract_y 
 _atom_site_fract_z 
 _atom_site_U_iso_or_equiv 
 _atom_site_adp_type 
 _atom_site_occupancy 
 _atom_site_symmetry_multiplicity 
 _atom_site_calc_flag 
 _atom_site_refinement_flags 
 _atom_site_disorder_assembly 
 _atom_site_disorder_group 
N1 N 0.32022(10) 0.72614(6) 0.54049(10) 0.0188(3) Uani 1 1 d . . . 
N2 N 0.56231(11) 0.52046(6) 0.86612(10) 0.0188(3) Uani 1 1 d . . . 
O1 O 0.25983(9) 0.70760(4) 0.71356(8) 0.0233(2) Uani 1 1 d . . . 
O2 O 0.40453(9) 0.63170(5) 0.78329(8) 0.0256(3) Uani 1 1 d . . . 
O3 O 0.30578(9) 0.64199(4) 1.00696(7) 0.0244(2) Uani 1 1 d . . . 
O4 O 0.35371(9) 0.55072(5) 0.94897(8) 0.0278(3) Uani 1 1 d . . . 
O1W O 0.71039(12) 0.34575(6) 0.78747(10) 0.0403(3) Uani 1 1 d . . . 
C1 C 0.30267(12) 0.65697(6) 0.76777(10) 0.0176(3) Uani 1 1 d . . . 
C2 C 0.29891(12) 0.60349(6) 0.93236(11) 0.0191(3) Uani 1 1 d . . . 
C3 C 0.21899(12) 0.62229(6) 0.81271(11) 0.0180(3) Uani 1 1 d . . . 
C4 C 0.09131(12) 0.65443(7) 0.78627(11) 0.0221(3) Uani 1 1 d . . . 
H4A H 0.0622 0.6491 0.8449 0.026 Uiso 1 1 calc R . . 
H4B H 0.0879 0.6996 0.7647 0.026 Uiso 1 1 calc R . . 
C5 C 0.02730(13) 0.60898(7) 0.68759(12) 0.0266(4) Uani 1 1 d . . . 
H5A H -0.0479 0.5874 0.6865 0.032 Uiso 1 1 calc R . . 
H5B H 0.0089 0.6286 0.6152 0.032 Uiso 1 1 calc R . . 
C6 C 0.14615(13) 0.56742(7) 0.73256(12) 0.0240(3) Uani 1 1 d . . . 
H6A H 0.1781 0.5573 0.6771 0.029 Uiso 1 1 calc R . . 
H6B H 0.1383 0.5285 0.7706 0.029 Uiso 1 1 calc R . . 
C7 C 0.45589(12) 0.71119(7) 0.57304(11) 0.0205(3) Uani 1 1 d . . . 
H7A H 0.4680 0.6643 0.5847 0.025 Uiso 1 1 calc R . . 
C8 C 0.49585(13) 0.73048(7) 0.48372(11) 0.0244(3) Uani 1 1 d . . . 
H8A H 0.4792 0.7763 0.4674 0.029 Uiso 1 1 calc R . . 
H8B H 0.4465 0.7064 0.4153 0.029 Uiso 1 1 calc R . . 
C9 C 0.63567(13) 0.71710(8) 0.52173(13) 0.0304(4) Uani 1 1 d . . . 
H9A H 0.6496 0.6706 0.5277 0.036 Uiso 1 1 calc R . . 
H9B H 0.6620 0.7333 0.4656 0.036 Uiso 1 1 calc R . . 
C10 C 0.71643(13) 0.74766(7) 0.63239(12) 0.0257(3) Uani 1 1 d . . . 
H10A H 0.7125 0.7944 0.6242 0.031 Uiso 1 1 calc R . . 
H10B H 0.8050 0.7344 0.6567 0.031 Uiso 1 1 calc R . . 
C11 C 0.67199(13) 0.72856(7) 0.71909(12) 0.0271(4) Uani 1 1 d . . . 
H11A H 0.6849 0.6824 0.7333 0.032 Uiso 1 1 calc R . . 
H11B H 0.7225 0.7511 0.7890 0.032 Uiso 1 1 calc R . . 
C12 C 0.53380(13) 0.74432(7) 0.68168(11) 0.0243(3) Uani 1 1 d . . . 
H12A H 0.5213 0.7908 0.6724 0.029 Uiso 1 1 calc R . . 
H12B H 0.5063 0.7303 0.7384 0.029 Uiso 1 1 calc R . . 
C13 C 0.22264(12) 0.69162(6) 0.44328(11) 0.0201(3) Uani 1 1 d . . . 
H13A H 0.2254 0.7078 0.3742 0.024 Uiso 1 1 calc R . . 
C14 C 0.09499(13) 0.70749(7) 0.44009(12) 0.0234(3) Uani 1 1 d . . . 
H14A H 0.0821 0.7540 0.4341 0.028 Uiso 1 1 calc R . . 
H14B H 0.0923 0.6933 0.5095 0.028 Uiso 1 1 calc R . . 
C15 C -0.00949(13) 0.67505(7) 0.34217(13) 0.0295(4) Uani 1 1 d . . . 
H15A H -0.0101 0.6914 0.2727 0.035 Uiso 1 1 calc R . . 
H15B H -0.0916 0.6852 0.3420 0.035 Uiso 1 1 calc R . . 
C16 C 0.00904(13) 0.60333(7) 0.34772(13) 0.0306(4) Uani 1 1 d . . . 
H16A H 0.0016 0.5864 0.4136 0.037 Uiso 1 1 calc R . . 
H16B H -0.0572 0.5834 0.2815 0.037 Uiso 1 1 calc R . . 
C17 C 0.13742(13) 0.58665(7) 0.35384(12) 0.0276(4) Uani 1 1 d . . . 
H17A H 0.1406 0.5989 0.2838 0.033 Uiso 1 1 calc R . . 
H17B H 0.1500 0.5401 0.3627 0.033 Uiso 1 1 calc R . . 
C18 C 0.24353(13) 0.62023(7) 0.45000(12) 0.0240(3) Uani 1 1 d . . . 
H18A H 0.2472 0.6042 0.5207 0.029 Uiso 1 1 calc R . . 
H18B H 0.3248 0.6107 0.4480 0.029 Uiso 1 1 calc R . . 
C19 C 0.67394(12) 0.55956(6) 0.87796(11) 0.0196(3) Uani 1 1 d . . . 
H19A H 0.6468 0.5901 0.8148 0.024 Uiso 1 1 calc R . . 
C20 C 0.71673(13) 0.59754(7) 0.98462(11) 0.0236(3) Uani 1 1 d . . . 
H20A H 0.7374 0.5680 1.0475 0.028 Uiso 1 1 calc R . . 
H20B H 0.6474 0.6254 0.9811 0.028 Uiso 1 1 calc R . . 
C21 C 0.83184(13) 0.63810(7) 1.00348(12) 0.0259(3) Uani 1 1 d . . . 
H21A H 0.8079 0.6714 0.9460 0.031 Uiso 1 1 calc R . . 
H21B H 0.8615 0.6594 1.0761 0.031 Uiso 1 1 calc R . . 
C22 C 0.93785(13) 0.59829(7) 1.00002(13) 0.0285(4) Uani 1 1 d . . . 
H22A H 1.0081 0.6264 1.0065 0.034 Uiso 1 1 calc R . . 
H22B H 0.9693 0.5685 1.0632 0.034 Uiso 1 1 calc R . . 
C23 C 0.89214(13) 0.56109(7) 0.89258(13) 0.0280(4) Uani 1 1 d . . . 
H23A H 0.9615 0.5343 0.8931 0.034 Uiso 1 1 calc R . . 
H23B H 0.8678 0.5911 0.8300 0.034 Uiso 1 1 calc R . . 
C24 C 0.77992(13) 0.51888(7) 0.87612(12) 0.0245(3) Uani 1 1 d . . . 
H24A H 0.7508 0.4964 0.8046 0.029 Uiso 1 1 calc R . . 
H24B H 0.8052 0.4867 0.9356 0.029 Uiso 1 1 calc R . . 
C25 C 0.50830(13) 0.47605(6) 0.76907(11) 0.0193(3) Uani 1 1 d . . . 
H25A H 0.5740 0.4443 0.7752 0.023 Uiso 1 1 calc R . . 
C26 C 0.46881(13) 0.51179(7) 0.66070(11) 0.0224(3) Uani 1 1 d . . . 
H26A H 0.5442 0.5294 0.6558 0.027 Uiso 1 1 calc R . . 
H26B H 0.4135 0.5477 0.6587 0.027 Uiso 1 1 calc R . . 
C27 C 0.39930(13) 0.46816(7) 0.56224(12) 0.0247(3) Uani 1 1 d . . . 
H27A H 0.3701 0.4931 0.4931 0.030 Uiso 1 1 calc R . . 
H27B H 0.4575 0.4350 0.5596 0.030 Uiso 1 1 calc R . . 
C28 C 0.28719(13) 0.43692(7) 0.57046(12) 0.0266(4) Uani 1 1 d . . . 
H28A H 0.2443 0.4084 0.5065 0.032 Uiso 1 1 calc R . . 
H28B H 0.2265 0.4699 0.5690 0.032 Uiso 1 1 calc R . . 
C29 C 0.33084(13) 0.39908(7) 0.67699(12) 0.0264(3) Uani 1 1 d . . . 
H29A H 0.3877 0.3647 0.6762 0.032 Uiso 1 1 calc R . . 
H29B H 0.2573 0.3793 0.6821 0.032 Uiso 1 1 calc R . . 
C30 C 0.39925(13) 0.44129(7) 0.77728(12) 0.0232(3) Uani 1 1 d . . . 
H30A H 0.3396 0.4726 0.7829 0.028 Uiso 1 1 calc R . . 
H30B H 0.4314 0.4150 0.8450 0.028 Uiso 1 1 calc R . . 
H1N1 H 0.3035(14) 0.7184(8) 0.6028(14) 0.033(4) Uiso 1 1 d . . . 
H2N1 H 0.3099(14) 0.7691(9) 0.5240(13) 0.029(4) Uiso 1 1 d . . . 
H1N2 H 0.5869(16) 0.4952(8) 0.9306(15) 0.040(5) Uiso 1 1 d . . . 
H2N2 H 0.4992(15) 0.5482(8) 0.8620(13) 0.032(4) Uiso 1 1 d . . . 
H1W H 0.7247(19) 0.3057(11) 0.7857(17) 0.063(7) Uiso 1 1 d . . . 
H2W H 0.708(2) 0.3539(10) 0.852(2) 0.071(7) Uiso 1 1 d . . . 
 
loop_ 
 _atom_site_aniso_label 
 _atom_site_aniso_U_11 
 _atom_site_aniso_U_22 
 _atom_site_aniso_U_33 
 _atom_site_aniso_U_23 
 _atom_site_aniso_U_13 
 _atom_site_aniso_U_12 
N1 0.0198(6) 0.0179(7) 0.0180(7) 0.0018(5) 0.0075(5) -0.0008(5) 
N2 0.0200(6) 0.0186(7) 0.0171(6) 0.0003(5) 0.0073(5) 0.0013(5) 
O1 0.0247(5) 0.0220(6) 0.0241(5) 0.0069(4) 0.0113(4) 0.0027(4) 
O2 0.0229(6) 0.0245(6) 0.0336(6) 0.0055(5) 0.0161(5) 0.0050(4) 
O3 0.0341(6) 0.0204(5) 0.0189(5) -0.0028(4) 0.0114(4) -0.0006(4) 
O4 0.0409(6) 0.0203(6) 0.0199(5) 0.0025(4) 0.0109(5) 0.0072(5) 
O1W 0.0686(9) 0.0270(7) 0.0351(7) 0.0019(5) 0.0316(6) 0.0029(6) 
C1 0.0215(8) 0.0162(8) 0.0128(7) -0.0017(6) 0.0052(6) -0.0009(6) 
C2 0.0221(7) 0.0164(8) 0.0214(8) -0.0009(6) 0.0118(6) -0.0036(6) 
C3 0.0214(7) 0.0153(7) 0.0175(7) -0.0010(6) 0.0085(6) -0.0005(6) 
C4 0.0217(7) 0.0232(8) 0.0228(8) 0.0000(6) 0.0110(6) -0.0010(6) 
C5 0.0225(8) 0.0327(9) 0.0228(8) -0.0005(7) 0.0079(6) -0.0048(7) 
C6 0.0262(8) 0.0214(8) 0.0240(8) -0.0032(6) 0.0105(6) -0.0048(6) 
C7 0.0186(7) 0.0174(7) 0.0230(8) 0.0018(6) 0.0064(6) -0.0004(6) 
C8 0.0226(8) 0.0292(8) 0.0194(7) -0.0029(6) 0.0071(6) -0.0026(6) 
C9 0.0235(8) 0.0373(9) 0.0317(9) -0.0077(7) 0.0131(7) -0.0036(7) 
C10 0.0199(7) 0.0263(8) 0.0281(8) 0.0002(7) 0.0075(6) -0.0013(6) 
C11 0.0233(8) 0.0256(8) 0.0233(8) 0.0049(6) 0.0014(6) -0.0054(6) 
C12 0.0256(8) 0.0275(8) 0.0188(8) 0.0011(6) 0.0085(6) -0.0063(6) 
C13 0.0193(7) 0.0214(8) 0.0167(7) 0.0013(6) 0.0051(6) -0.0024(6) 
C14 0.0215(7) 0.0207(8) 0.0262(8) 0.0038(6) 0.0085(6) 0.0004(6) 
C15 0.0185(8) 0.0292(9) 0.0347(9) 0.0038(7) 0.0056(7) -0.0003(7) 
C16 0.0237(8) 0.0288(9) 0.0317(9) -0.0002(7) 0.0046(7) -0.0069(7) 
C17 0.0277(8) 0.0210(8) 0.0299(8) -0.0022(7) 0.0082(7) -0.0040(6) 
C18 0.0214(7) 0.0219(8) 0.0262(8) 0.0000(6) 0.0077(6) 0.0002(6) 
C19 0.0202(7) 0.0182(7) 0.0199(7) 0.0021(6) 0.0081(6) 0.0001(6) 
C20 0.0235(8) 0.0241(8) 0.0228(8) -0.0021(6) 0.0096(6) 0.0017(6) 
C21 0.0259(8) 0.0254(8) 0.0224(8) -0.0039(6) 0.0065(6) -0.0023(6) 
C22 0.0221(8) 0.0282(9) 0.0325(9) 0.0004(7) 0.0090(7) -0.0026(6) 
C23 0.0238(8) 0.0276(9) 0.0358(9) -0.0011(7) 0.0157(7) 0.0010(7) 
C24 0.0250(8) 0.0227(8) 0.0266(8) -0.0015(6) 0.0120(7) 0.0001(6) 
C25 0.0212(7) 0.0171(7) 0.0193(7) -0.0015(6) 0.0082(6) 0.0014(6) 
C26 0.0266(8) 0.0202(8) 0.0204(8) 0.0004(6) 0.0099(6) 0.0005(6) 
C27 0.0292(8) 0.0236(8) 0.0187(7) 0.0008(6) 0.0076(6) 0.0036(6) 
C28 0.0225(8) 0.0270(8) 0.0253(8) -0.0063(7) 0.0053(6) 0.0030(6) 
C29 0.0235(8) 0.0255(8) 0.0301(8) -0.0034(7) 0.0114(7) -0.0045(6) 
C30 0.0247(8) 0.0229(8) 0.0232(8) 0.0008(6) 0.0115(6) -0.0001(6) 
 
_geom_special_details 
; 
 All esds (except the esd in the dihedral angle between two l.s. planes) 
 are estimated using the full covariance matrix.  The cell esds are taken 
 into account individually in the estimation of esds in distances, angles 
 and torsion angles; correlations between esds in cell parameters are only 
 used when they are defined by crystal symmetry.  An approximate (isotropic) 
 treatment of cell esds is used for estimating esds involving l.s. planes. 
; 
 
loop_ 
 _geom_bond_atom_site_label_1 
 _geom_bond_atom_site_label_2 
 _geom_bond_distance 
 _geom_bond_site_symmetry_2 
 _geom_bond_publ_flag 
N1 C7 1.4986(18) . ? 
N1 C13 1.5050(18) . ? 
N1 H1N1 0.951(18) . ? 
N1 H2N1 0.928(18) . ? 
N2 C19 1.5010(18) . ? 
N2 C25 1.5044(17) . ? 
N2 H1N2 0.948(19) . ? 
N2 H2N2 0.929(17) . ? 
O1 O1 0.000(3) 1 ? 
O1 C1 1.2671(16) . ? 
O2 O2 0.000(3) 1 ? 
O2 C1 1.2458(16) . ? 
O3 C2 1.2628(16) . ? 
O4 O4 0.000(3) 1 ? 
O4 C2 1.2564(17) . ? 
O1W H1W 0.86(2) . ? 
O1W H2W 0.90(3) . ? 
C1 O2 1.2458(16) 1 ? 
C1 O1 1.2671(16) 1 ? 
C1 C3 1.5415(19) . ? 
C2 O4 1.2564(17) 1 ? 
C2 C3 1.5240(19) . ? 
C3 C4 1.5456(19) . ? 
C3 C6 1.5609(19) . ? 
C4 C5 1.543(2) . ? 
C4 H4A 0.9900 . ? 
C4 H4B 0.9900 . ? 
C5 C6 1.538(2) . ? 
C5 H5A 0.9900 . ? 
C5 H5B 0.9900 . ? 
C6 H6A 0.9900 . ? 
C6 H6B 0.9900 . ? 
C7 C8 1.517(2) . ? 
C7 C12 1.5183(19) . ? 
C7 H7A 1.0000 . ? 
C8 C9 1.527(2) . ? 
C8 H8A 0.9900 . ? 
C8 H8B 0.9900 . ? 
C9 C10 1.520(2) . ? 
C9 H9A 0.9900 . ? 
C9 H9B 0.9900 . ? 
C10 C11 1.519(2) . ? 
C10 H10A 0.9900 . ? 
C10 H10B 0.9900 . ? 
C11 C12 1.520(2) . ? 
C11 H11A 0.9900 . ? 
C11 H11B 0.9900 . ? 
C12 H12A 0.9900 . ? 
C12 H12B 0.9900 . ? 
C13 C18 1.520(2) . ? 
C13 C14 1.5227(19) . ? 
C13 H13A 1.0000 . ? 
C14 C15 1.524(2) . ? 
C14 H14A 0.9900 . ? 
C14 H14B 0.9900 . ? 
C15 C16 1.523(2) . ? 
C15 H15A 0.9900 . ? 
C15 H15B 0.9900 . ? 
C16 C17 1.520(2) . ? 
C16 H16A 0.9900 . ? 
C16 H16B 0.9900 . ? 
C17 C18 1.531(2) . ? 
C17 H17A 0.9900 . ? 
C17 H17B 0.9900 . ? 
C18 H18A 0.9900 . ? 
C18 H18B 0.9900 . ? 
C19 C24 1.5228(19) . ? 
C19 C20 1.5234(19) . ? 
C19 H19A 1.0000 . ? 
C20 C21 1.529(2) . ? 
C20 H20A 0.9900 . ? 
C20 H20B 0.9900 . ? 
C21 C22 1.521(2) . ? 
C21 H21A 0.9900 . ? 
C21 H21B 0.9900 . ? 
C22 C23 1.521(2) . ? 
C22 H22A 0.9900 . ? 
C22 H22B 0.9900 . ? 
C23 C24 1.528(2) . ? 
C23 H23A 0.9900 . ? 
C23 H23B 0.9900 . ? 
C24 H24A 0.9900 . ? 
C24 H24B 0.9900 . ? 
C25 C26 1.5214(19) . ? 
C25 C30 1.5227(19) . ? 
C25 H25A 1.0000 . ? 
C26 C27 1.527(2) . ? 
C26 H26A 0.9900 . ? 
C26 H26B 0.9900 . ? 
C27 C28 1.521(2) . ? 
C27 H27A 0.9900 . ? 
C27 H27B 0.9900 . ? 
C28 C29 1.520(2) . ? 
C28 H28A 0.9900 . ? 
C28 H28B 0.9900 . ? 
C29 C30 1.523(2) . ? 
C29 H29A 0.9900 . ? 
C29 H29B 0.9900 . ? 
C30 H30A 0.9900 . ? 
C30 H30B 0.9900 . ? 
 
loop_ 
 _geom_angle_atom_site_label_1 
 _geom_angle_atom_site_label_2 
 _geom_angle_atom_site_label_3 
 _geom_angle 
 _geom_angle_site_symmetry_1 
 _geom_angle_site_symmetry_3 
 _geom_angle_publ_flag 
C7 N1 C13 118.32(11) . . ? 
C7 N1 H1N1 107.7(9) . . ? 
C13 N1 H1N1 108.0(10) . . ? 
C7 N1 H2N1 106.8(9) . . ? 
C13 N1 H2N1 107.0(10) . . ? 
H1N1 N1 H2N1 108.7(14) . . ? 
C19 N2 C25 117.36(10) . . ? 
C19 N2 H1N2 107.5(10) . . ? 
C25 N2 H1N2 106.8(10) . . ? 
C19 N2 H2N2 107.7(10) . . ? 
C25 N2 H2N2 108.0(10) . . ? 
H1N2 N2 H2N2 109.4(14) . . ? 
O1 O1 C1 0(10) 1 . ? 
O2 O2 C1 0(10) 1 . ? 
O4 O4 C2 0(10) 1 . ? 
H1W O1W H2W 108(2) . . ? 
O2 C1 O2 0.00(13) 1 . ? 
O2 C1 O1 125.02(12) 1 . ? 
O2 C1 O1 125.02(12) . . ? 
O2 C1 O1 125.02(12) 1 1 ? 
O2 C1 O1 125.02(12) . 1 ? 
O1 C1 O1 0.00(9) . 1 ? 
O2 C1 C3 117.60(12) 1 . ? 
O2 C1 C3 117.60(12) . . ? 
O1 C1 C3 117.30(12) . . ? 
O1 C1 C3 117.30(12) 1 . ? 
O4 C2 O4 0.00(10) 1 . ? 
O4 C2 O3 125.02(12) 1 . ? 
O4 C2 O3 125.02(12) . . ? 
O4 C2 C3 117.08(12) 1 . ? 
O4 C2 C3 117.08(12) . . ? 
O3 C2 C3 117.90(12) . . ? 
C2 C3 C1 108.92(11) . . ? 
C2 C3 C4 117.20(11) . . ? 
C1 C3 C4 115.14(11) . . ? 
C2 C3 C6 116.23(11) . . ? 
C1 C3 C6 109.68(11) . . ? 
C4 C3 C6 88.42(10) . . ? 
C5 C4 C3 89.73(10) . . ? 
C5 C4 H4A 113.7 . . ? 
C3 C4 H4A 113.7 . . ? 
C5 C4 H4B 113.7 . . ? 
C3 C4 H4B 113.7 . . ? 
H4A C4 H4B 110.9 . . ? 
C6 C5 C4 89.33(10) . . ? 
C6 C5 H5A 113.8 . . ? 
C4 C5 H5A 113.8 . . ? 
C6 C5 H5B 113.8 . . ? 
C4 C5 H5B 113.8 . . ? 
H5A C5 H5B 111.0 . . ? 
C5 C6 C3 89.33(10) . . ? 
C5 C6 H6A 113.8 . . ? 
C3 C6 H6A 113.8 . . ? 
C5 C6 H6B 113.8 . . ? 
C3 C6 H6B 113.8 . . ? 
H6A C6 H6B 111.0 . . ? 
N1 C7 C8 111.48(11) . . ? 
N1 C7 C12 108.30(11) . . ? 
C8 C7 C12 111.69(11) . . ? 
N1 C7 H7A 108.4 . . ? 
C8 C7 H7A 108.4 . . ? 
C12 C7 H7A 108.4 . . ? 
C7 C8 C9 109.98(12) . . ? 
C7 C8 H8A 109.7 . . ? 
C9 C8 H8A 109.7 . . ? 
C7 C8 H8B 109.7 . . ? 
C9 C8 H8B 109.7 . . ? 
H8A C8 H8B 108.2 . . ? 
C10 C9 C8 112.48(12) . . ? 
C10 C9 H9A 109.1 . . ? 
C8 C9 H9A 109.1 . . ? 
C10 C9 H9B 109.1 . . ? 
C8 C9 H9B 109.1 . . ? 
H9A C9 H9B 107.8 . . ? 
C9 C10 C11 110.97(12) . . ? 
C9 C10 H10A 109.4 . . ? 
C11 C10 H10A 109.4 . . ? 
C9 C10 H10B 109.4 . . ? 
C11 C10 H10B 109.4 . . ? 
H10A C10 H10B 108.0 . . ? 
C12 C11 C10 111.14(12) . . ? 
C12 C11 H11A 109.4 . . ? 
C10 C11 H11A 109.4 . . ? 
C12 C11 H11B 109.4 . . ? 
C10 C11 H11B 109.4 . . ? 
H11A C11 H11B 108.0 . . ? 
C11 C12 C7 109.76(12) . . ? 
C11 C12 H12A 109.7 . . ? 
C7 C12 H12A 109.7 . . ? 
C11 C12 H12B 109.7 . . ? 
C7 C12 H12B 109.7 . . ? 
H12A C12 H12B 108.2 . . ? 
N1 C13 C18 112.48(11) . . ? 
N1 C13 C14 107.28(11) . . ? 
C18 C13 C14 110.58(11) . . ? 
N1 C13 H13A 108.8 . . ? 
C18 C13 H13A 108.8 . . ? 
C14 C13 H13A 108.8 . . ? 
C13 C14 C15 110.45(12) . . ? 
C13 C14 H14A 109.6 . . ? 
C15 C14 H14A 109.6 . . ? 
C13 C14 H14B 109.6 . . ? 
C15 C14 H14B 109.6 . . ? 
H14A C14 H14B 108.1 . . ? 
C14 C15 C16 110.89(12) . . ? 
C14 C15 H15A 109.5 . . ? 
C16 C15 H15A 109.5 . . ? 
C14 C15 H15B 109.5 . . ? 
C16 C15 H15B 109.5 . . ? 
H15A C15 H15B 108.0 . . ? 
C17 C16 C15 110.50(12) . . ? 
C17 C16 H16A 109.5 . . ? 
C15 C16 H16A 109.5 . . ? 
C17 C16 H16B 109.5 . . ? 
C15 C16 H16B 109.5 . . ? 
H16A C16 H16B 108.1 . . ? 
C16 C17 C18 111.91(12) . . ? 
C16 C17 H17A 109.2 . . ? 
C18 C17 H17A 109.2 . . ? 
C16 C17 H17B 109.2 . . ? 
C18 C17 H17B 109.2 . . ? 
H17A C17 H17B 107.9 . . ? 
C13 C18 C17 110.74(12) . . ? 
C13 C18 H18A 109.5 . . ? 
C17 C18 H18A 109.5 . . ? 
C13 C18 H18B 109.5 . . ? 
C17 C18 H18B 109.5 . . ? 
H18A C18 H18B 108.1 . . ? 
N2 C19 C24 112.11(11) . . ? 
N2 C19 C20 108.07(11) . . ? 
C24 C19 C20 111.50(11) . . ? 
N2 C19 H19A 108.3 . . ? 
C24 C19 H19A 108.3 . . ? 
C20 C19 H19A 108.3 . . ? 
C19 C20 C21 111.23(11) . . ? 
C19 C20 H20A 109.4 . . ? 
C21 C20 H20A 109.4 . . ? 
C19 C20 H20B 109.4 . . ? 
C21 C20 H20B 109.4 . . ? 
H20A C20 H20B 108.0 . . ? 
C22 C21 C20 111.61(12) . . ? 
C22 C21 H21A 109.3 . . ? 
C20 C21 H21A 109.3 . . ? 
C22 C21 H21B 109.3 . . ? 
C20 C21 H21B 109.3 . . ? 
H21A C21 H21B 108.0 . . ? 
C23 C22 C21 110.51(12) . . ? 
C23 C22 H22A 109.5 . . ? 
C21 C22 H22A 109.5 . . ? 
C23 C22 H22B 109.5 . . ? 
C21 C22 H22B 109.5 . . ? 
H22A C22 H22B 108.1 . . ? 
C22 C23 C24 111.71(12) . . ? 
C22 C23 H23A 109.3 . . ? 
C24 C23 H23A 109.3 . . ? 
C22 C23 H23B 109.3 . . ? 
C24 C23 H23B 109.3 . . ? 
H23A C23 H23B 107.9 . . ? 
C19 C24 C23 109.55(12) . . ? 
C19 C24 H24A 109.8 . . ? 
C23 C24 H24A 109.8 . . ? 
C19 C24 H24B 109.8 . . ? 
C23 C24 H24B 109.8 . . ? 
H24A C24 H24B 108.2 . . ? 
N2 C25 C26 111.18(11) . . ? 
N2 C25 C30 107.10(10) . . ? 
C26 C25 C30 112.60(11) . . ? 
N2 C25 H25A 108.6 . . ? 
C26 C25 H25A 108.6 . . ? 
C30 C25 H25A 108.6 . . ? 
C25 C26 C27 111.06(11) . . ? 
C25 C26 H26A 109.4 . . ? 
C27 C26 H26A 109.4 . . ? 
C25 C26 H26B 109.4 . . ? 
C27 C26 H26B 109.4 . . ? 
H26A C26 H26B 108.0 . . ? 
C28 C27 C26 111.02(12) . . ? 
C28 C27 H27A 109.4 . . ? 
C26 C27 H27A 109.4 . . ? 
C28 C27 H27B 109.4 . . ? 
C26 C27 H27B 109.4 . . ? 
H27A C27 H27B 108.0 . . ? 
C27 C28 C29 109.88(11) . . ? 
C27 C28 H28A 109.7 . . ? 
C29 C28 H28A 109.7 . . ? 
C27 C28 H28B 109.7 . . ? 
C29 C28 H28B 109.7 . . ? 
H28A C28 H28B 108.2 . . ? 
C28 C29 C30 111.20(12) . . ? 
C28 C29 H29A 109.4 . . ? 
C30 C29 H29A 109.4 . . ? 
C28 C29 H29B 109.4 . . ? 
C30 C29 H29B 109.4 . . ? 
H29A C29 H29B 108.0 . . ? 
C25 C30 C29 111.15(11) . . ? 
C25 C30 H30A 109.4 . . ? 
C29 C30 H30A 109.4 . . ? 
C25 C30 H30B 109.4 . . ? 
C29 C30 H30B 109.4 . . ? 
H30A C30 H30B 108.0 . . ? 
 
loop_ 
 _geom_hbond_atom_site_label_D 
 _geom_hbond_atom_site_label_H 
 _geom_hbond_atom_site_label_A 
 _geom_hbond_distance_DH 
 _geom_hbond_distance_HA 
 _geom_hbond_distance_DA 
 _geom_hbond_angle_DHA 
 _geom_hbond_site_symmetry_A 
N1 H1N1 O1  0.951(18) 1.782(18) 2.7300(15) 175.0(14) 1 
N1 H2N1 O3  0.928(18) 1.884(18) 2.8069(16) 173.1(14) 4_575 
N2 H1N2 O4  0.948(19) 1.75(2) 2.6964(15) 174.8(15) 3_667 
N2 H2N2 O2  0.929(17) 2.107(17) 2.8996(16) 142.5(13) 1 
N2 H2N2 O4  0.929(17) 2.451(16) 3.1641(15) 133.7(13) 1 
O1W H1W O1  0.86(2) 2.07(2) 2.9315(16) 173(2) 2_646 
O1W H2W O3  0.90(3) 1.96(3) 2.8542(15) 171(2) 3_667 
 
_diffrn_measured_fraction_theta_max    0.994 
_diffrn_reflns_theta_full              22.50 
_diffrn_measured_fraction_theta_full   0.994 
_refine_diff_density_max    0.159 
_refine_diff_density_min   -0.175 
_refine_diff_density_rms    0.035 
